# Supplementary material for: Fluorene as π-conjugation linker in N^N Pt(ii) bisacetylide complexes and their applications for triplet–triplet annihilation based upconversion
Source: Royal Society of Chemistry journal article supplement (doi:10.1039/c2jm32074f), 2012-01-01
Supplement: c2jm32074f.pdf [file c2jm32074f.pdf]

## Electronic Supplementary Information for:

# Fluorene as $\pi$ -Conjugation Linker in $N^{\wedge}N$ Pt(II) bisacetylide Complexes and Their Applications for Triplet-triplet Annihilation Based Upconversion

Huimin Guo, Qiuting Li, Lihua Ma, Jianzhang Zhao\*

State Key Laboratory of Fine Chemicals, Dalian University of Technology, Dalian, 116024, P. R. China.

E-mail: zhaojzh@dlut.edu.cn

Group webpage: <http://finechem.dlut.edu.cn/photochem>

## Index

|                                                                                                           |     |
|-----------------------------------------------------------------------------------------------------------|-----|
| General information.....                                                                                  | S2  |
| Fig S1. $^1\text{H}$ NMR of <b>a</b> .....                                                                | S2  |
| Fig S2. $^1\text{H}$ NMR of <b>L-1</b> .....                                                              | S3  |
| Fig S3. $^{13}\text{C}$ NMR of <b>L-1</b> .....                                                           | S3  |
| Fig S4. HR-MALDI-MS of <b>L-1</b> .....                                                                   | S4  |
| Fig S5. $^1\text{H}$ NMR of <b>Pt-1</b> .....                                                             | S4  |
| Fig S6. $^{13}\text{C}$ NMR of <b>Pt-1</b> .....                                                          | S5  |
| Fig S7. HR-MALDI-MS of <b>Pt-1</b> .....                                                                  | S5  |
| Fig S8. $^1\text{H}$ NMR of <b>b</b> .....                                                                | S6  |
| Fig S9. $^1\text{H}$ NMR of <b>L-2</b> .....                                                              | S6  |
| Fig S10. $^{13}\text{C}$ NMR of <b>L-2</b> .....                                                          | S7  |
| Fig S11. HR-MALDI-MS of <b>L-2</b> .....                                                                  | S7  |
| Fig S12. $^1\text{H}$ NMR of <b>Pt-2</b> .....                                                            | S8  |
| Fig S13. $^{13}\text{C}$ NMR of <b>Pt-2</b> .....                                                         | S8  |
| Fig S14. HR-MALDI-MS of <b>Pt-2</b> .....                                                                 | S9  |
| Fig S15. UV-Vis absorption spectra of in different solutions.....                                         | S9  |
| Fig S16. Emission spectra of in different solutions.....                                                  | S9  |
| Fig S17. Delayed fluorescence of the upconversion with Pt-2 as the triplet photosensitizer.....           | S10 |
| Fig S18. Delayed fluorescence of the upconversion with Pt-3 as the triplet photosensitizer.....           | S10 |
| Fig S19. Delayed fluorescence of the upconversion with different sensitizer/acceptor concentrations ..... | S11 |
| Fig S20. The upconversion of <b>Pt-3</b> with increased DPA concentration.....                            | S12 |
| The coordinates of complex <b>Pt-1</b> .....                                                              | S12 |
| The coordinates of complex <b>Pt-2</b> .....                                                              | S15 |
| The coordinates of complex <b>Pt-3</b> .....                                                              | S19 |

## Experimental Section

### General

All the chemicals are analytical pure and were used as received. Solvents were dried and distilled for synthesis. NMR spectra were recorded on a 400 MHz Varian Unity Inova NMR spectrophotometer. Mass spectra were recorded with Q-TOF Micro MS spectrometer. UV-Vis absorption spectra were measured with a HP8453 UV-visible spectrophotometer. Fluorescence spectra were recorded on JASCO FP-6500 or a Sanco 970 CRT spectrofluorometer. Fluorescence lifetimes were measured on a Horiba Jobin Yvon Fluoro Max-4 (TCSPC) instrument. Emission curves were generated using the Origin 5.0 (Microcal software). The binding constants were calculated using custom-written nonlinear least-square curve-fitting programs implemented within SigmaPlot 2000 (SPSS Inc.).

All these calculations were performed in Gaussian 09W.

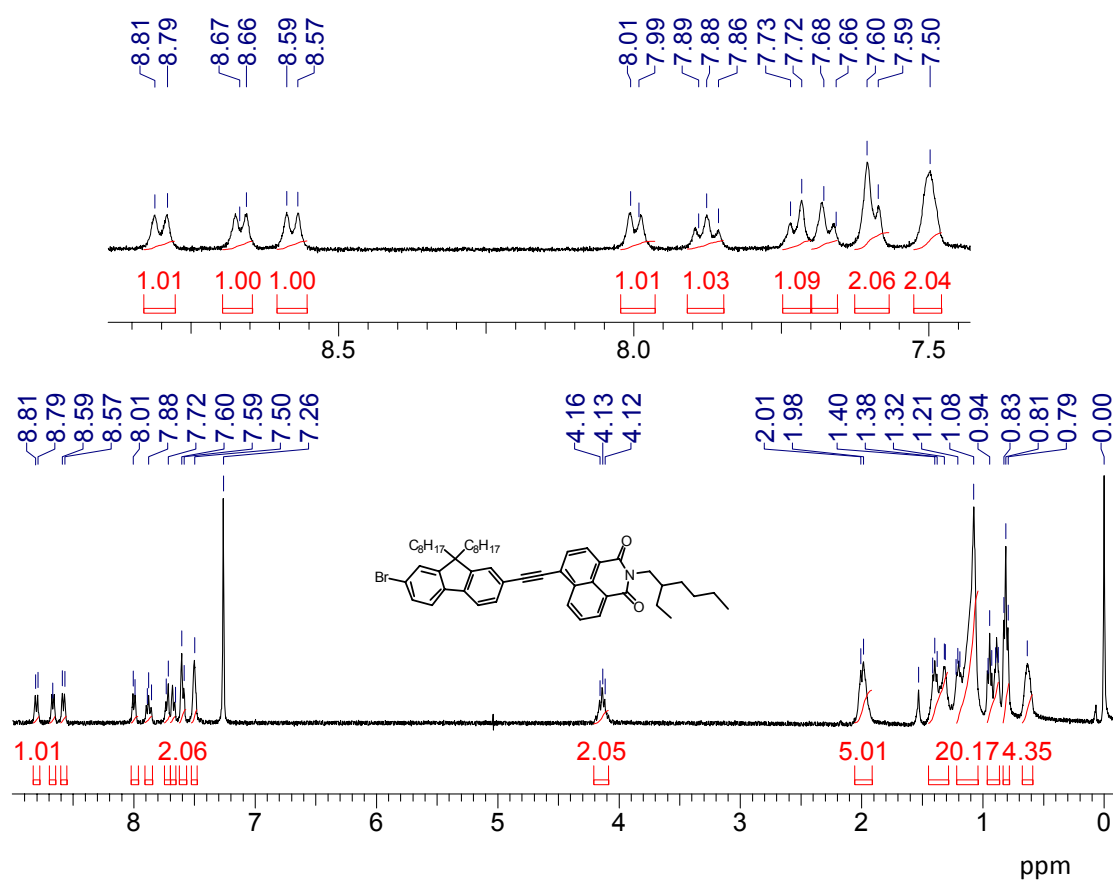

Fig. S1  $^1H$  NMR of compound a ( $CDCl_3$ , 400 MHz) .

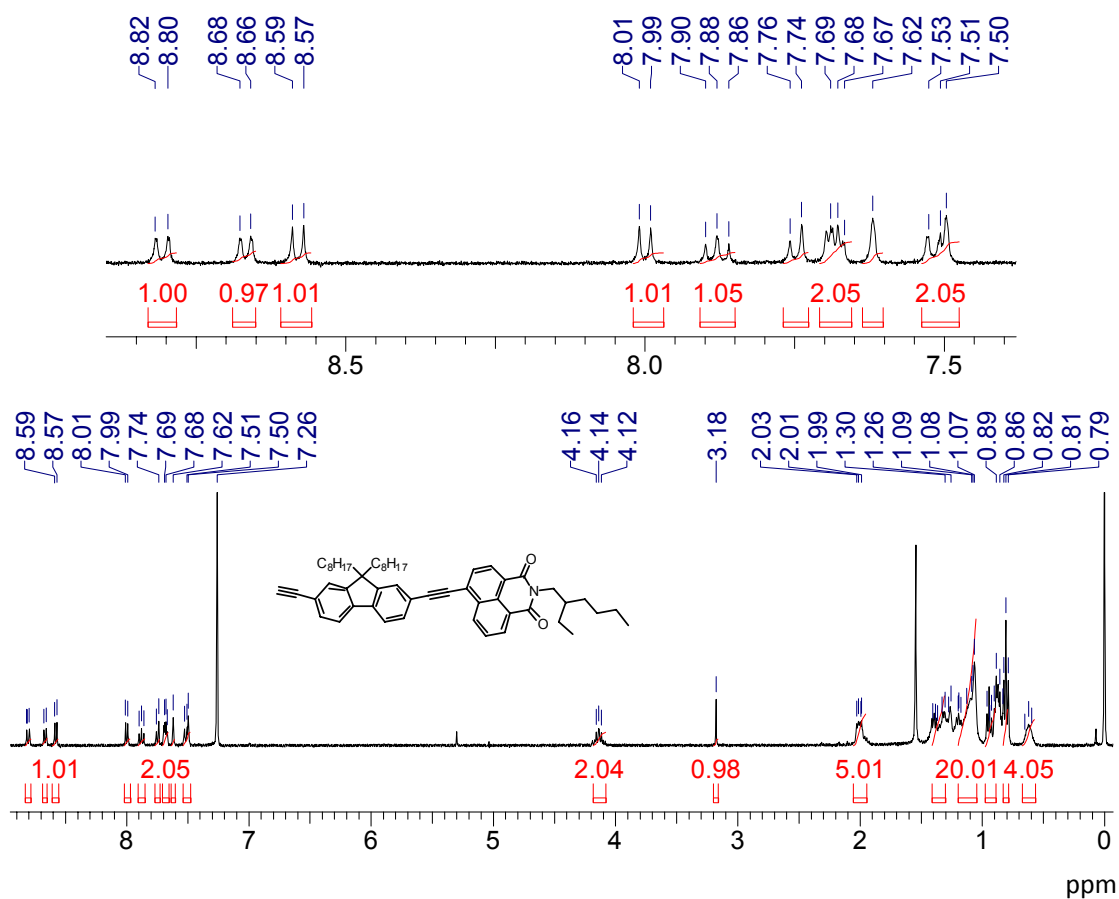

Fig. S2 <sup>1</sup>H NMR of compound L-1 (CDCl<sub>3</sub>, 400 MHz).

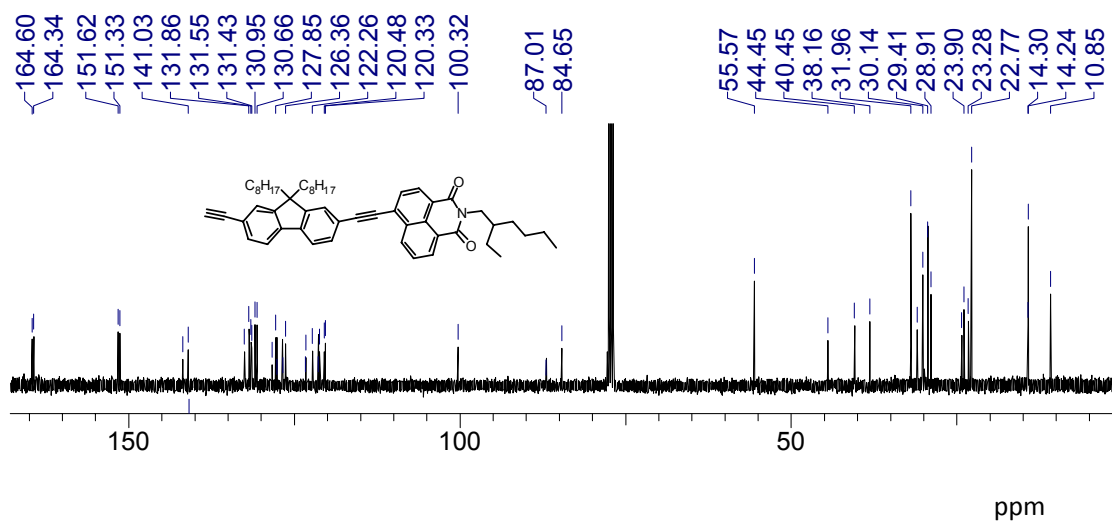

Fig. S3 <sup>13</sup>C NMR of compound L-1 (CDCl<sub>3</sub>, 100 MHz).

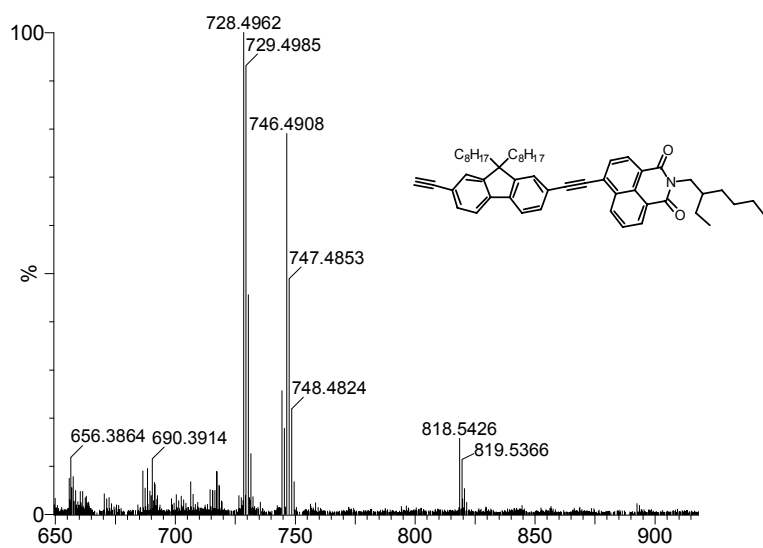

Fig. S4 HR-MALDI-MS of L-1.

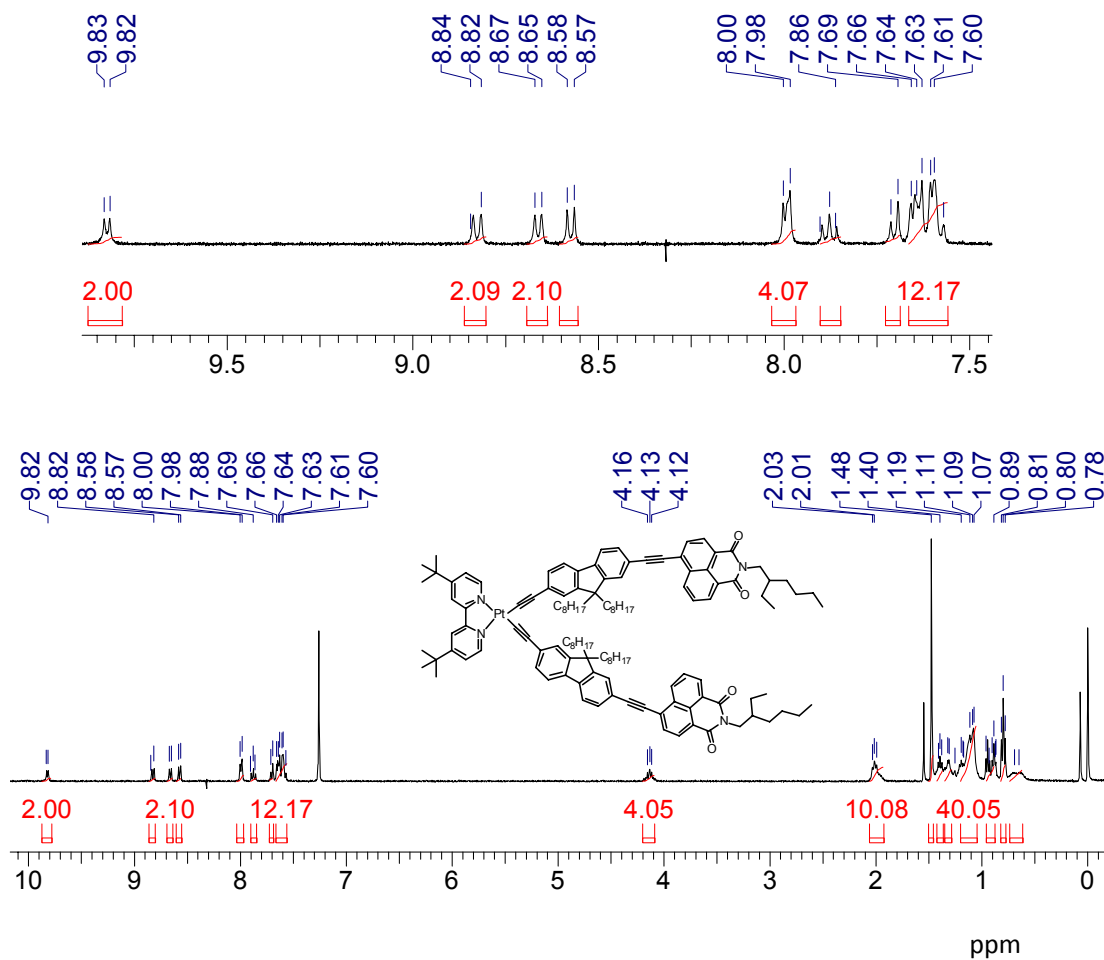

Fig. S5 <sup>1</sup>H NMR of compound Pt-1 (CDCl<sub>3</sub>, 400 MHz).



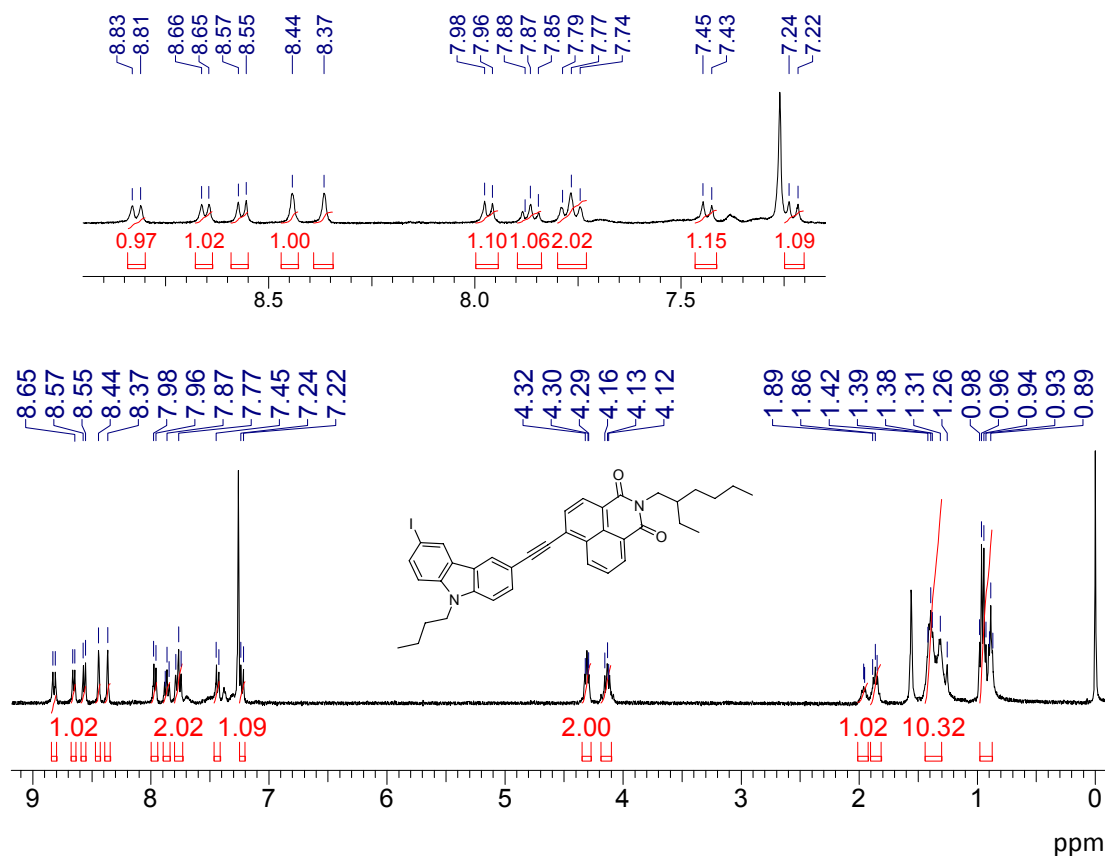

Fig. S8 <sup>1</sup>H NMR of compound **b** (CDCl<sub>3</sub>, 400 MHz).

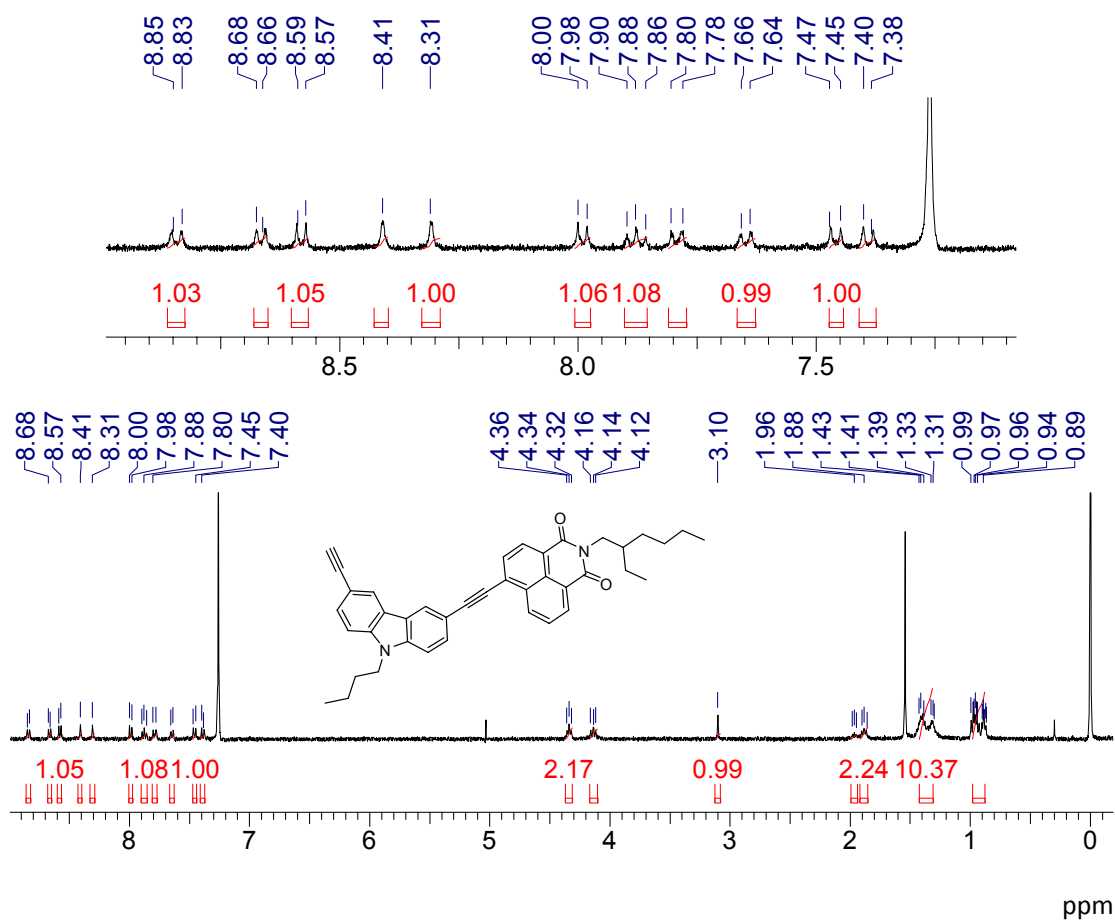

Fig. S9 <sup>1</sup>H NMR of compound **L-2** (CDCl<sub>3</sub>, 400 MHz).

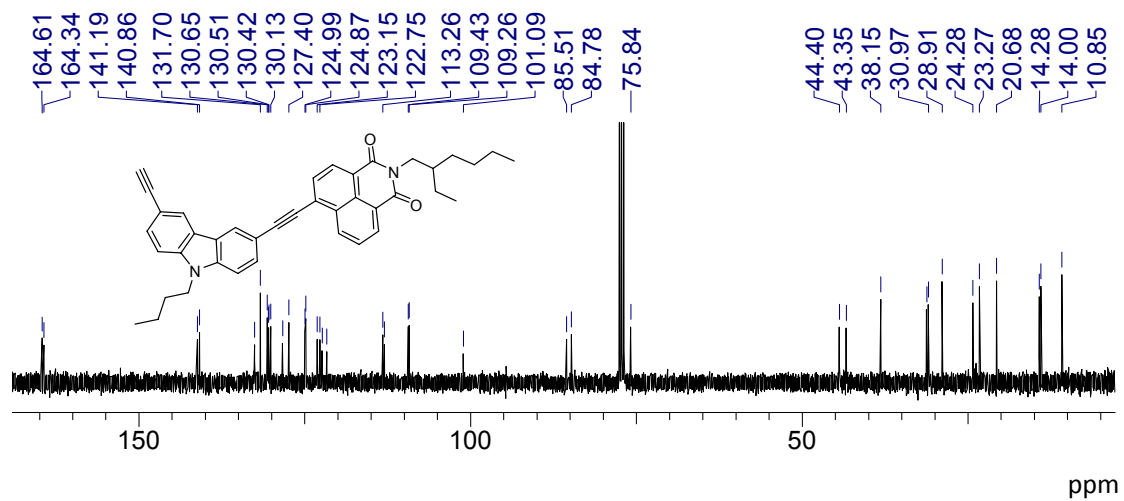

Fig. S10  $^{13}\text{C}$  NMR of compound L-2 (CDCl<sub>3</sub>, 100 MHz).

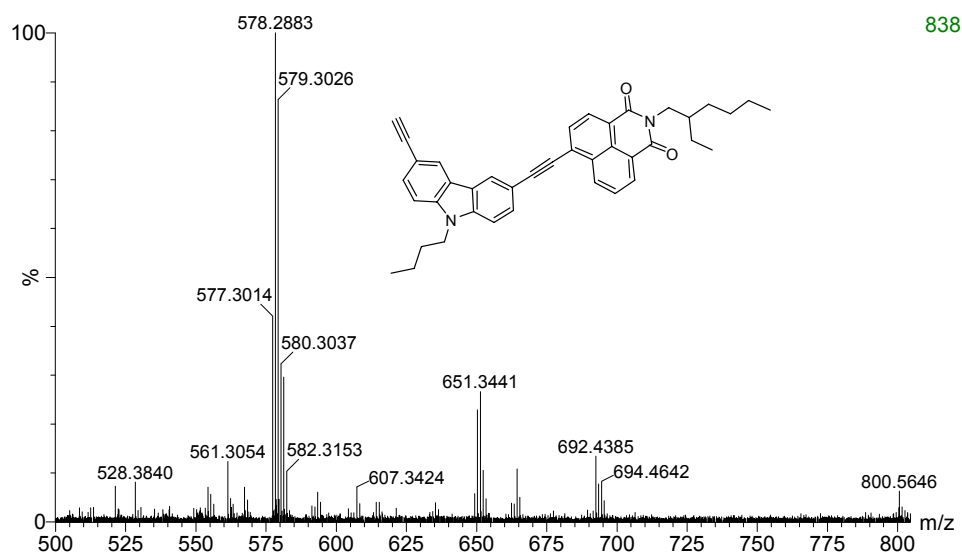

Fig. S11 HR-MALDI-MS of L-2.

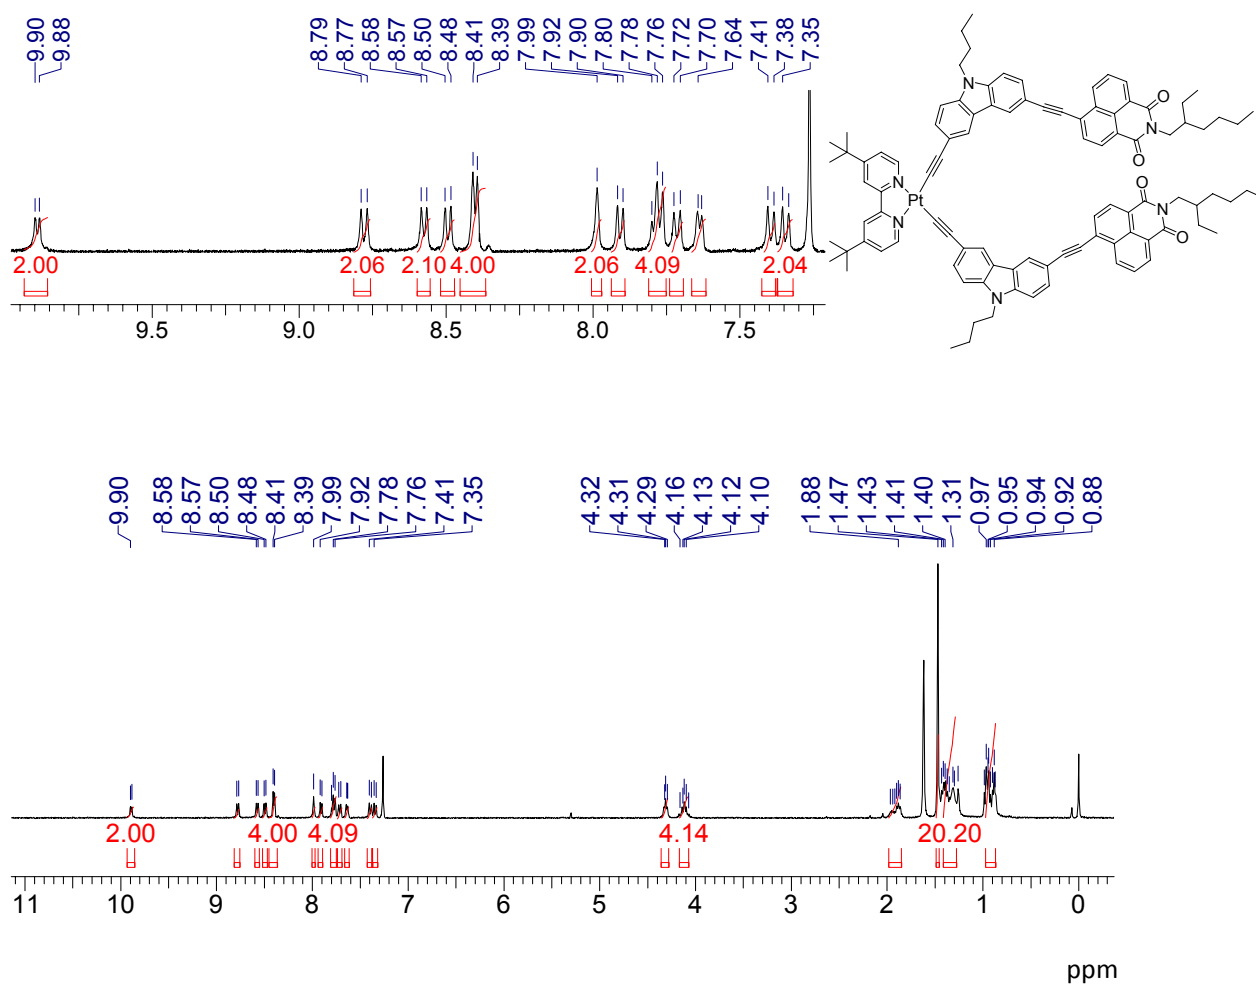

Fig. S12 <sup>1</sup>H NMR of compound Pt-2 (CDCl<sub>3</sub>, 400 MHz).

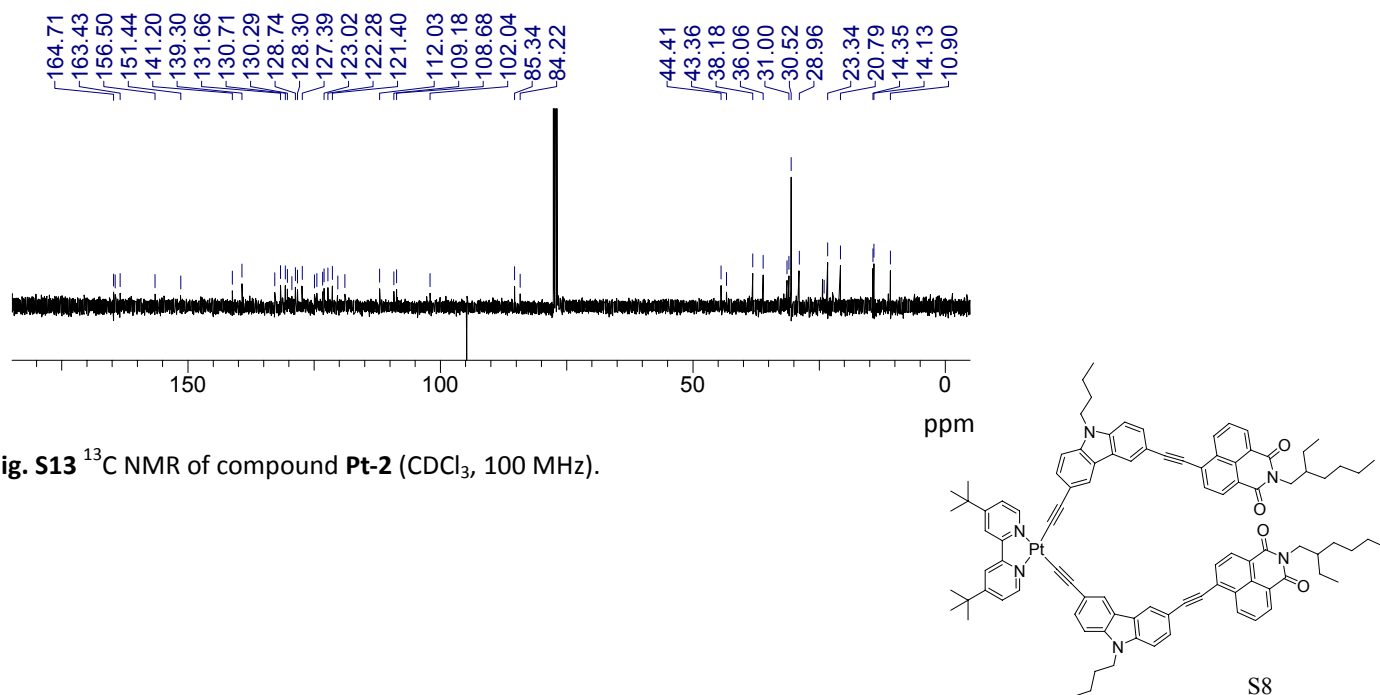

Fig. S13 <sup>13</sup>C NMR of compound Pt-2 (CDCl<sub>3</sub>, 100 MHz).



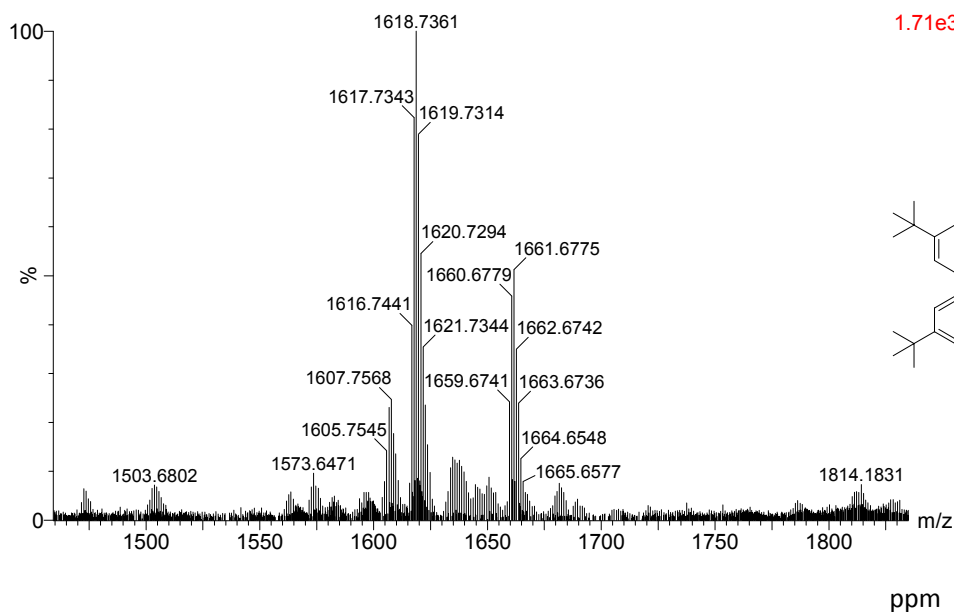

**Fig. S14** HR-MALDI-MS of Pt-2.

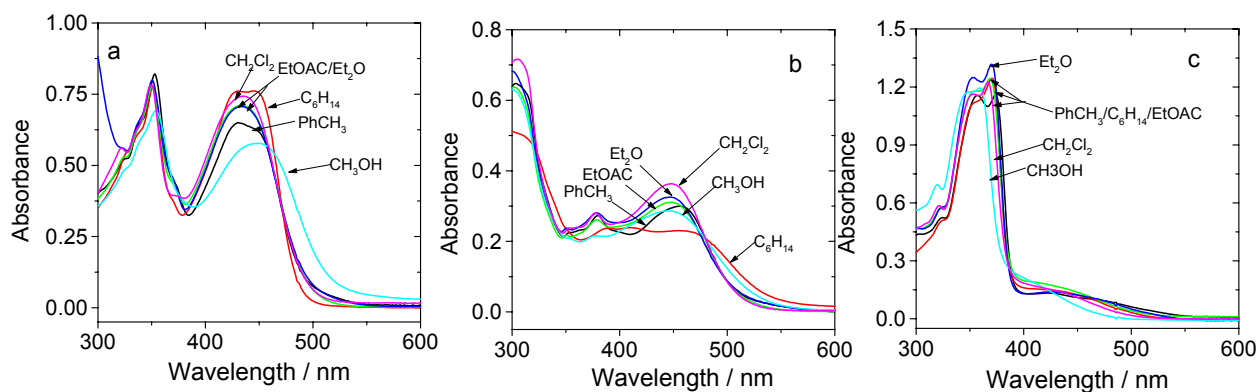

**Fig. S15** UV-Vis absorption spectra of (a) Pt-1, (b) Pt-2 and (c) Pt-5 in different solutions.  $c = 1.0 \times 10^{-5}$  M, 20 °C.

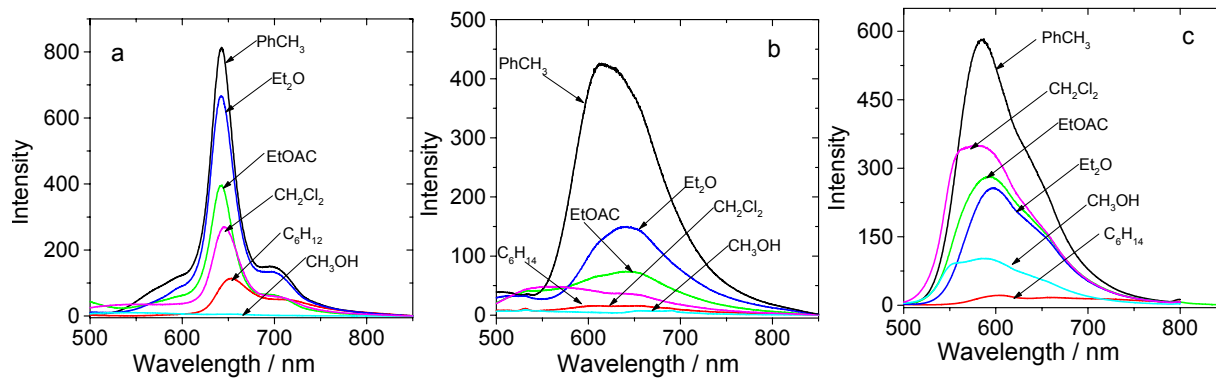

**Fig. S16** Emission spectra of (a) Pt-1, (b) Pt-2 and (c) Pt-5 in different solutions.  $c = 1.0 \times 10^{-5}$  M, 20 °C.

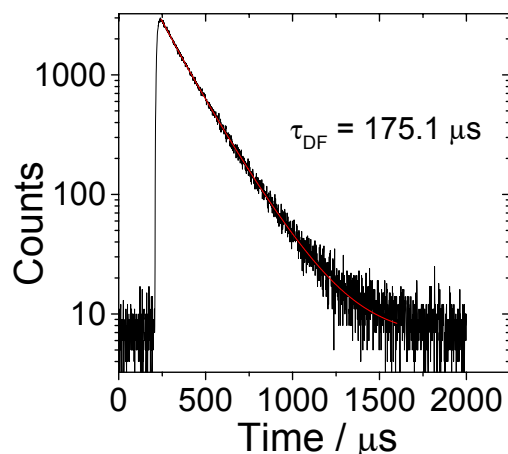

**Fig. S17** Delayed fluorescence observed in the TTA upconversion with compound **Pt-2** as triplet photosensitizer and DPA as the triplet acceptor. Excited at 473 nm (nanosecond pulsed OPO laser synchronized with spectrofluorometer) and monitored at 410 nm. Under this circumstance the compound **Pt-2** is selectively excited and the emission is due to the upconverted emission of DPA. In deaerated toluene.  $c[\text{Sensitizers}] = 1.0 \times 10^{-5} \text{M}$ ;  $c[\text{DPA}] = 4.3 \times 10^{-4} \text{M}$ ; 20 °C.

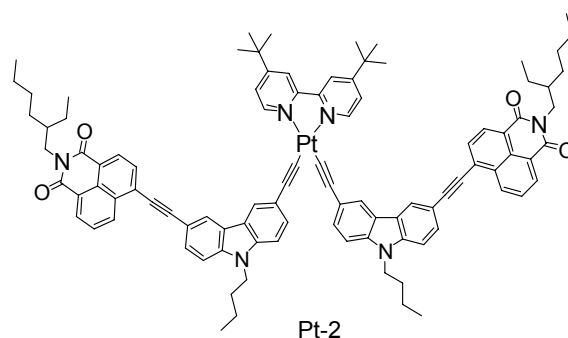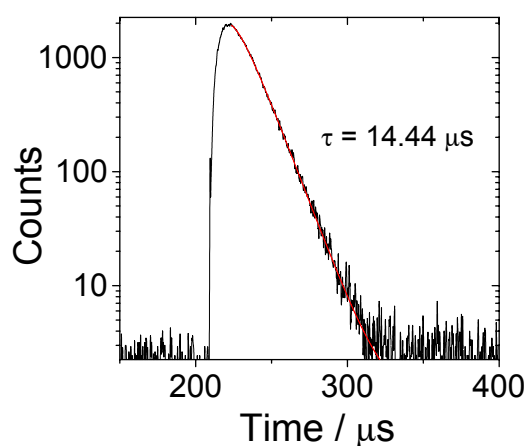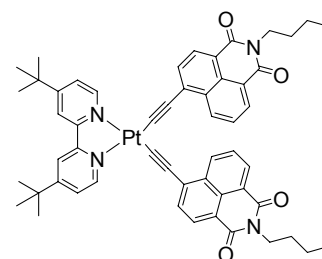

**Fig. S18** Delayed fluorescence observed in the TTA upconversion with compound **Pt-3** as triplet photosensitizer and DPA as the triplet acceptor. Excited at 473 nm (nanosecond pulsed OPO laser synchronized with spectrofluorometer) and monitored at 410 nm. Under this circumstance the compound **Pt-3** is selectively excited and the emission is due to the upconverted emission of DPA. In deaerated toluene.  $c[\text{Sensitizers}] = 1.0 \times 10^{-5} \text{M}$ ;  $c[\text{DPA}] = 4.3 \times 10^{-4} \text{M}$ ; 20 °C.

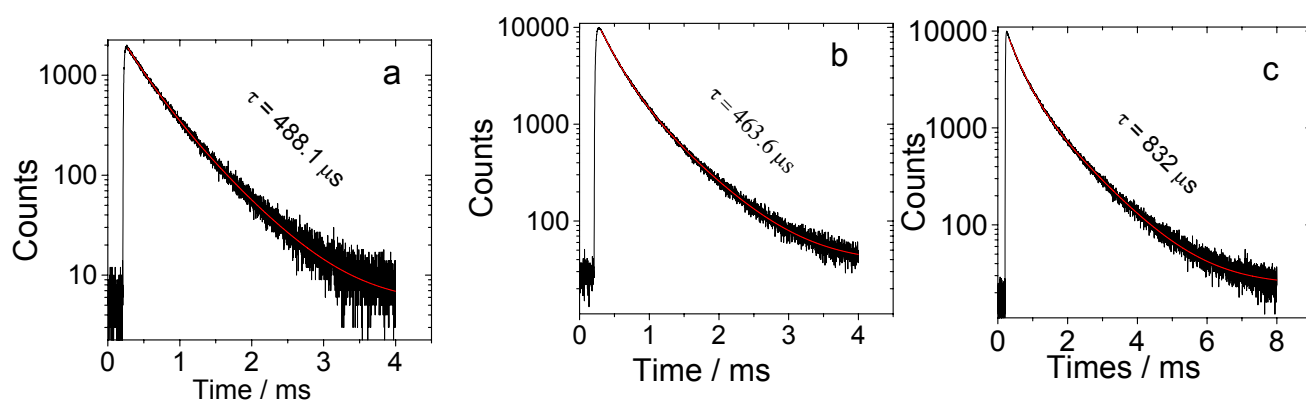

**Fig. S19** Delayed fluorescence observed in the TTA upconversion with compound **Pt-1** as triplet photosensitizer and DPA as the triplet acceptor. Excited at 473 nm (nanosecond pulsed OPO laser synchronized with spectrofluorometer) and monitored at 410 nm. Under this circumstance the compound **Pt-1** is selectively excited and the emission is due to the upconverted emission of DPA. (a)  $c[\text{Sensitizers}] = 1.0 \times 10^{-5} \text{ M}$ ;  $c[\text{DPA}] = 4.3 \times 10^{-4} \text{ M}$ ; (b)  $c[\text{Sensitizers}] = 1.0 \times 10^{-5} \text{ M}$ ;  $c[\text{DPA}] = 2.2 \times 10^{-4} \text{ M}$ ; (c)  $c[\text{Sensitizers}] = 5.0 \times 10^{-6} \text{ M}$ ;  $c[\text{DPA}] = 4.3 \times 10^{-4} \text{ M}$ . In deaerated toluene. 20 °C.

The integrated luminescence intensity of the upconversion experiments (Fig. 8 in the main text):

For **Pt-1** as the triplet photosensitizer,

The area of the total upconverted emission: 60631

The scattered laser peak area: 456

The peak area beyond the laser: 6993

The upconversion quantum yield is 21.3% without the above two areas are considered.

Similarly, the upconversion quantum yield with **Pt-2** as the triplet photosensitizer is 13.0% with the above correction;

Similarly, the upconversion quantum yield with **Pt-2** as the triplet photosensitizer is 15.9% with the above correction;

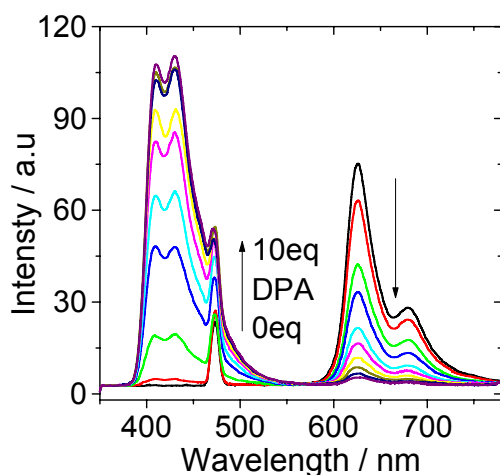

**Fig. S20** The upconversion of **Pt-3** with increased DPA concentration. Excited with 473 nm laser.  $c[\text{sensitizer}] = 1.0 \times 10^{-5}$  M in toluene. 25 °C.

**Complex Pt-1 (DFT//B3LYP/6-31G(d)/LanL2DZ)**

Symbolic Z-matrix:

Charge = 0 Multiplicity = 1 Ground state geometry.

|    |             |            |            |
|----|-------------|------------|------------|
| C  | -3.48971045 | 6.94745047 | 0.00085383 |
| C  | -2.92808307 | 8.23576640 | 0.00092148 |
| C  | -1.52384960 | 8.30875608 | 0.00098446 |
| C  | -0.73682800 | 7.15505490 | 0.00098613 |
| C  | -2.67040165 | 5.82123618 | 0.00085575 |
| C  | 0.73695867  | 7.15502289 | 0.00104837 |
| C  | 1.52403100  | 8.30868951 | 0.00111561 |
| C  | 2.92826134  | 8.23563791 | 0.00116459 |
| C  | 3.48983199  | 6.94729732 | 0.00114158 |
| C  | 2.67047375  | 5.82111918 | 0.00107583 |
| H  | -4.56117963 | 6.80345128 | 0.00080120 |
| H  | -3.06307677 | 4.81257231 | 0.00080405 |
| H  | 4.56129486  | 6.80325083 | 0.00117494 |
| H  | 3.06310463  | 4.81243807 | 0.00105258 |
| N  | 1.32261215  | 5.91476620 | 0.00103022 |
| N  | -1.32253584 | 5.91482383 | 0.00092234 |
| Pt | 0.00000293  | 4.27867408 | 0.00091451 |
| H  | 1.04052207  | 9.27668265 | 0.00113013 |
| H  | -1.04029800 | 9.27672779 | 0.00103371 |
| C  | 3.77056474  | 9.52427643 | 0.00124083 |

|   |             |             |             |
|---|-------------|-------------|-------------|
| C | -3.77032877 | 9.52444254  | 0.00092671  |
| C | 3.43377529  | 10.35614968 | -1.26778627 |
| H | 2.37610630  | 10.63910976 | -1.30165027 |
| H | 4.02714466  | 11.27752464 | -1.27647193 |
| H | 3.66378255  | 9.79226460  | -2.17852845 |
| C | 3.43372994  | 10.35602512 | 1.27033793  |
| H | 4.02710610  | 11.27739446 | 1.27914008  |
| H | 2.37606139  | 10.63898857 | 1.30418660  |
| H | 3.66369584  | 9.79204663  | 2.18103274  |
| C | 5.28698672  | 9.22525112  | 0.00125235  |
| H | 5.59091348  | 8.66224241  | 0.89101308  |
| H | 5.59094274  | 8.66232808  | -0.88855256 |
| H | 5.84269887  | 10.16879284 | 0.00130711  |
| C | -3.43350562 | 10.35621758 | 1.27000942  |
| H | -2.37582562 | 10.63913436 | 1.30389158  |
| H | -4.02683909 | 11.27761502 | 1.27875744  |
| H | -3.66353403 | 9.79228032  | 2.18071399  |
| C | -3.43345240 | 10.35625922 | -1.26811469 |
| H | -4.02678425 | 11.27765773 | -1.27685694 |
| H | -2.37577016 | 10.63917405 | -1.30194299 |
| H | -3.66344386 | 9.79235202  | -2.17884718 |
| C | -5.28676437 | 9.22548603  | 0.00089111  |
| H | -5.59071467 | 8.66255245  | -0.88890909 |
| H | -5.59074811 | 8.66251557  | 0.89065660  |
| H | -5.84243370 | 10.16905298 | 0.00089985  |
| C | -7.94009263 | -3.70726312 | -0.00060202 |
| C | -9.07218062 | -2.85628280 | -0.00055447 |
| C | -8.88140021 | -1.44915354 | -0.00033861 |
| C | -7.59654055 | -0.93196394 | -0.00017809 |
| C | -6.46995182 | -1.79395675 | -0.00022595 |
| C | -6.64744507 | -3.18369935 | -0.00043860 |
| H | -8.09165185 | -4.78131857 | -0.00076869 |
| H | -9.75170470 | -0.80068701 | -0.00030329 |
| H | -5.79295081 | -3.85288946 | -0.00047881 |
| C | -5.62847739 | 0.38855150  | 0.00013474  |
| C | -4.66390365 | 1.38520075  | 0.00033564  |
| C | -3.28654262 | 1.04219669  | 0.00038011  |
| C | -2.93124328 | -0.33241374 | 0.00021571  |
| C | -3.90086665 | -1.33410176 | 0.00001265  |
| C | -5.25548200 | -0.97714844 | -0.00002918 |
| H | -4.94190607 | 2.43473969  | 0.00046108  |
| H | -1.87836777 | -0.59123435 | 0.00025057  |
| H | -3.59994583 | -2.37759042 | -0.00011129 |
| C | -2.27868112 | 2.04714242  | 0.00058063  |
| C | -1.37963294 | 2.88913613  | 0.00073823  |
| C | -7.15617702 | 0.53817847  | 0.00005369  |

|   |              |             |             |
|---|--------------|-------------|-------------|
| C | -7.65305530  | 1.27632667  | -1.26987658 |
| H | -8.74845321  | 1.31941174  | -1.28857270 |
| H | -7.27188179  | 2.30401856  | -1.28899422 |
| H | -7.31201385  | 0.76713133  | -2.17669258 |
| C | -7.65322221  | 1.27598456  | 1.27011736  |
| H | -8.74862213  | 1.31907760  | 1.28867480  |
| H | -7.31231066  | 0.76653817  | 2.17684130  |
| H | -7.27203885  | 2.30366647  | 1.28956912  |
| C | -12.45015407 | -8.05817388 | -0.00127096 |
| C | -12.13430965 | -6.70960514 | -0.00114201 |
| C | -13.15395901 | -5.72223580 | -0.00113225 |
| C | -14.51943931 | -6.14881865 | -0.00126095 |
| C | -14.82069060 | -7.53927934 | -0.00139041 |
| C | -13.79709056 | -8.47668138 | -0.00139453 |
| H | -11.65919717 | -8.80010197 | -0.00127659 |
| H | -11.09929002 | -6.38654708 | -0.00104566 |
| C | -12.86728269 | -4.30738355 | -0.00099540 |
| C | -15.56805509 | -5.19012777 | -0.00125714 |
| H | -14.05784191 | -9.52872586 | -0.00149451 |
| C | -15.26568644 | -3.83386579 | -0.00112828 |
| C | -13.93268154 | -3.39674828 | -0.00099863 |
| H | -16.08267976 | -3.12145957 | -0.00112878 |
| H | -13.71423320 | -2.33527456 | -0.00089678 |
| C | -16.22483597 | -8.00110116 | -0.00152008 |
| C | -16.97518449 | -5.62503673 | -0.00138700 |
| N | -17.22185856 | -7.00895700 | -0.00151326 |
| C | -18.63542525 | -7.42910686 | -0.00163488 |
| H | -18.65656673 | -8.51636226 | -0.00178783 |
| H | -19.13874737 | -7.03332059 | 0.88340093  |
| H | -19.13866514 | -7.03306320 | -0.88660068 |
| O | -17.93560215 | -4.82266802 | -0.00138591 |
| O | -16.52867717 | -9.21459730 | -0.00162886 |
| C | -11.53019709 | -3.83285524 | -0.00085332 |
| C | -10.38737643 | -3.39649786 | -0.00071955 |
| C | 7.94002500   | -3.70733732 | -0.00040009 |
| C | 9.07211226   | -2.85635592 | -0.00030556 |
| C | 8.88133137   | -1.44922716 | -0.00009389 |
| C | 7.59647117   | -0.93203836 | 0.00001852  |
| C | 6.46988297   | -1.79403157 | -0.00007610 |
| C | 6.64737680   | -3.18377413 | -0.00028721 |
| H | 8.09158460   | -4.78139257 | -0.00056196 |
| H | 9.75163500   | -0.80075974 | -0.00002081 |
| H | 5.79288297   | -3.85296475 | -0.00036185 |
| C | 5.62840754   | 0.38847620  | 0.00027119  |
| C | 4.66383349   | 1.38512513  | 0.00045390  |
| C | 3.28647274   | 1.04212072  | 0.00045208  |

|   |             |             |             |
|---|-------------|-------------|-------------|
| C | 2.93117358  | -0.33248971 | 0.00025816  |
| C | 3.90079728  | -1.33417761 | 0.00007480  |
| C | 5.25541271  | -0.97722383 | 0.00008175  |
| H | 4.94183579  | 2.43466405  | 0.00060193  |
| H | 1.87829818  | -0.59131063 | 0.00025872  |
| H | 3.59987671  | -2.37766632 | -0.00006878 |
| C | 2.27861150  | 2.04706648  | 0.00064482  |
| C | 1.37957946  | 2.88907744  | 0.00079180  |
| C | 7.15610701  | 0.53810387  | 0.00024022  |
| C | 7.65311177  | 1.27590730  | 1.27032076  |
| H | 8.74851116  | 1.31899852  | 1.28891405  |
| H | 7.27192978  | 2.30358991  | 1.28976150  |
| H | 7.31216974  | 0.76646034  | 2.17703292  |
| C | 7.65302504  | 1.27625499  | -1.26967316 |
| H | 8.74842348  | 1.31934364  | -1.28833323 |
| H | 7.31201507  | 0.76705939  | -2.17650085 |
| H | 7.27184861  | 2.30394563  | -1.28880244 |
| C | 12.45012152 | -8.05823616 | -0.00077438 |
| C | 12.13426578 | -6.70966996 | -0.00069294 |
| C | 13.15390705 | -5.72229247 | -0.00067696 |
| C | 14.51939099 | -6.14886463 | -0.00074854 |
| C | 14.82065393 | -7.53932225 | -0.00082994 |
| C | 13.79706124 | -8.47673287 | -0.00084224 |
| H | 11.65917087 | -8.80017092 | -0.00078478 |
| H | 11.09924366 | -6.38661995 | -0.00063895 |
| C | 12.86722030 | -4.30744277 | -0.00058666 |
| C | 15.56799905 | -5.19016576 | -0.00073568 |
| H | 14.05782074 | -9.52877523 | -0.00090455 |
| C | 15.26561992 | -3.83390619 | -0.00065007 |
| C | 13.93261143 | -3.39679883 | -0.00057522 |
| H | 16.08260773 | -3.12149386 | -0.00064187 |
| H | 13.71415515 | -2.33532696 | -0.00050662 |
| C | 16.22480322 | -8.00113302 | -0.00089819 |
| C | 16.97513242 | -5.62506330 | -0.00081243 |
| N | 17.22181787 | -7.00898108 | -0.00088374 |
| C | 18.63538757 | -7.42911987 | -0.00094154 |
| H | 18.65653789 | -8.51637512 | -0.00101234 |
| H | 19.13864625 | -7.03314199 | -0.88592672 |
| H | 19.13868572 | -7.03326053 | 0.88407481  |
| O | 17.93554399 | -4.82268742 | -0.00078717 |
| O | 16.52865510 | -9.21462630 | -0.00096248 |
| C | 11.53013063 | -3.83292414 | -0.00049916 |
| C | 10.38730849 | -3.39657090 | -0.00041383 |

.....

SCF Done: E(RB+HF-LYP) = -3801.49198894 a.u.

Number of Imaginary frequencies: 0

**complex pt-2 (DFT//B3LYP/6-31G(d)/ LanL2DZ)**

Symbolic Z-matrix:

Charge = 0 Multiplicity = 1 Ground state geometry.

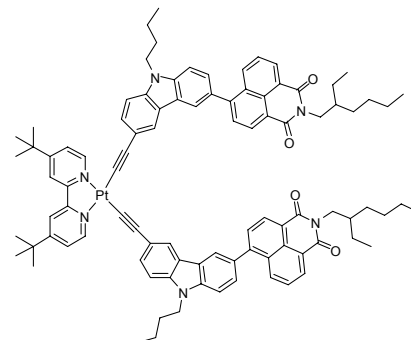

|    |             |             |             |
|----|-------------|-------------|-------------|
| C  | 3.48900200  | -3.05121400 | 0.06270800  |
| C  | 2.92798600  | -4.33994500 | 0.05207900  |
| C  | 1.52413500  | -4.41347000 | 0.02803700  |
| C  | 0.73662600  | -3.25997700 | 0.01441700  |
| C  | 2.66955600  | -1.92533600 | 0.04935900  |
| C  | -0.73663800 | -3.25997000 | -0.01221500 |
| C  | -1.52416300 | -4.41345500 | -0.02570400 |
| C  | -2.92801300 | -4.33991400 | -0.04976800 |
| C  | -3.48901000 | -3.05117600 | -0.06055700 |
| C  | -2.66954800 | -1.92530700 | -0.04733400 |
| H  | 4.56028200  | -2.90689100 | 0.08126700  |
| H  | 3.06155100  | -0.91640000 | 0.05715300  |
| H  | -4.56028800 | -2.90683800 | -0.07914300 |
| H  | -3.06153200 | -0.91636700 | -0.05525600 |
| N  | -1.32168300 | -2.01926300 | -0.02328100 |
| N  | 1.32168900  | -2.01927600 | 0.02532800  |
| Pt | 0.00001100  | -0.38434500 | 0.00091400  |
| H  | -1.04091800 | -5.38160000 | -0.01742800 |
| H  | 1.04087700  | -5.38160900 | 0.01987100  |
| C  | -3.77090100 | -5.62818000 | -0.06419200 |
| C  | 3.77085500  | -5.62822400 | 0.06660400  |
| C  | -3.41902000 | -6.45543100 | -1.33217000 |
| H  | -2.36104400 | -6.73851400 | -1.35378800 |
| H  | -4.01283200 | -7.37636900 | -1.35194100 |
| H  | -3.63729700 | -5.88767600 | -2.24340400 |
| C  | -3.45028900 | -6.46516500 | 1.20558800  |
| H  | -4.04402500 | -7.38637500 | 1.20333800  |
| H  | -2.39324200 | -6.74875000 | 1.25169700  |
| H  | -3.69152500 | -5.90471400 | 2.11555700  |
| C  | -5.28711500 | -5.32849500 | -0.08130400 |
| H  | -5.60075600 | -4.76664700 | 0.80583000  |
| H  | -5.58057900 | -4.76399900 | -0.97363000 |
| H  | -5.84341500 | -6.27166000 | -0.08915400 |
| C  | 3.41897200  | -6.45538600 | 1.33463500  |



|   |             |             |             |
|---|-------------|-------------|-------------|
| H | 2.36099800  | -6.73847000 | 1.35628300  |
| H | 4.01278000  | -7.37632600 | 1.35446200  |
| H | 3.63726000  | -5.88757400 | 2.24583100  |
| C | 3.45022200  | -6.46528300 | -1.20312200 |
| H | 4.04393600  | -7.38650800 | -1.20082200 |
| H | 2.39316700  | -6.74884000 | -1.24920500 |
| H | 3.69146400  | -5.90489400 | -2.11312800 |
| C | 5.28707400  | -5.32856100 | 0.08369600  |
| H | 5.60073000  | -4.76679800 | -0.80348700 |
| H | 5.58054000  | -4.76399000 | 0.97597300  |
| H | 5.84335800  | -6.27173400 | 0.09162800  |
| C | 15.46817500 | 2.15788200  | -0.01312400 |
| C | 14.11318900 | 1.87048700  | -0.00210900 |
| C | 13.65207500 | 0.52839700  | -0.01303100 |
| C | 14.61821500 | -0.52639000 | -0.03591200 |
| C | 16.00483300 | -0.20821000 | -0.04680400 |
| C | 16.41898500 | 1.11660900  | -0.03548000 |
| H | 15.80374100 | 3.18913500  | -0.00460200 |
| H | 13.38114000 | 2.67008300  | 0.01493200  |
| C | 12.24847400 | 0.18853500  | -0.00210900 |
| C | 14.19602800 | -1.88282400 | -0.04777600 |
| H | 17.48221400 | 1.32696500  | -0.04425600 |
| C | 12.83912100 | -2.18384300 | -0.03734500 |
| C | 11.87726500 | -1.16328800 | -0.01486800 |
| H | 12.54107400 | -3.22607100 | -0.04681700 |
| H | 10.82350900 | -1.41637200 | -0.00675700 |
| C | 17.01913600 | -1.28299700 | -0.07028000 |
| C | 15.18633600 | -2.97156700 | -0.07102900 |
| N | 16.54425600 | -2.60695900 | -0.08091800 |
| C | 17.52505800 | -3.70775200 | -0.10437800 |
| H | 18.51814000 | -3.26463700 | -0.10954300 |
| H | 17.39001900 | -4.34207900 | 0.77464600  |
| H | 17.37131000 | -4.32092900 | -0.99525200 |
| O | 14.86819700 | -4.18229500 | -0.08203100 |
| O | 18.24697400 | -1.04268500 | -0.08039100 |
| C | 3.25409900  | 2.88857700  | 0.07263500  |
| C | 2.84904200  | 4.25443200  | 0.10143800  |
| C | 3.76704900  | 5.30174900  | 0.12609800  |
| C | 5.12847100  | 4.98107400  | 0.12648700  |
| C | 5.56927900  | 3.62939900  | 0.09212600  |
| C | 4.63335500  | 2.59256400  | 0.06726000  |
| H | 1.78660800  | 4.47011600  | 0.10087200  |
| H | 3.42362200  | 6.33057000  | 0.13881500  |
| H | 4.95358200  | 1.55627500  | 0.04180600  |
| C | 7.40100400  | 5.04584600  | 0.12520000  |
| C | 8.74819400  | 5.43259600  | 0.12197000  |

|   |              |             |             |
|---|--------------|-------------|-------------|
| C | 9.71785000   | 4.43575200  | 0.09646700  |
| C | 9.37061000   | 3.05585200  | 0.06907800  |
| C | 8.00803300   | 2.68261500  | 0.06571700  |
| C | 7.02343700   | 3.66702600  | 0.09128400  |
| H | 9.04009500   | 6.47678300  | 0.13326800  |
| H | 10.76748000  | 4.70827400  | 0.09389300  |
| H | 7.74395400   | 1.63091500  | 0.04129900  |
| N | 6.24970900   | 5.82622700  | 0.15805300  |
| C | 6.20217600   | 7.27980200  | 0.17733400  |
| H | 6.11147200   | 7.70139100  | -0.83171600 |
| H | 5.34856400   | 7.61173400  | 0.77450600  |
| H | 7.10984200   | 7.67164700  | 0.64209100  |
| C | 10.38806900  | 2.06314100  | 0.04302700  |
| C | 11.25559600  | 1.20054000  | 0.02163100  |
| C | 2.27006800   | 1.85675300  | 0.04791200  |
| C | 1.37787700   | 1.00850200  | 0.02837100  |
| C | -15.46817300 | 2.15790500  | 0.01055000  |
| C | -14.11318700 | 1.87050200  | -0.00013600 |
| C | -13.65208300 | 0.52840700  | 0.01074600  |
| C | -14.61824000 | -0.52637400 | 0.03323000  |
| C | -16.00485900 | -0.20818500 | 0.04379100  |
| C | -16.41899800 | 1.11663700  | 0.03252600  |
| H | -15.80372900 | 3.18916200  | 0.00206100  |
| H | -13.38113000 | 2.67009700  | -0.01689000 |
| C | -12.24847800 | 0.18853100  | 0.00016800  |
| C | -14.19606900 | -1.88281200 | 0.04504200  |
| H | -17.48222700 | 1.32700100  | 0.04105700  |
| C | -12.83916100 | -2.18384200 | 0.03494900  |
| C | -11.87728800 | -1.16329600 | 0.01286100  |
| H | -12.54112700 | -3.22607400 | 0.04437600  |
| H | -10.82353400 | -1.41639300 | 0.00500700  |
| C | -17.01917700 | -1.28296700 | 0.06685800  |
| C | -15.18639000 | -2.97155200 | 0.06788200  |
| N | -16.54431000 | -2.60693500 | 0.07741800  |
| C | -17.52512900 | -3.70772300 | 0.10044800  |
| H | -18.51821300 | -3.26460600 | 0.10486700  |
| H | -17.38947000 | -4.34222400 | -0.77835000 |
| H | -17.37201000 | -4.32072400 | 0.99155800  |
| O | -14.86826300 | -4.18228300 | 0.07881800  |
| O | -18.24701500 | -1.04264700 | 0.07670800  |
| C | -3.25405500  | 2.88858800  | -0.07117500 |
| C | -2.84899600  | 4.25445300  | -0.09950300 |
| C | -3.76700000  | 5.30177000  | -0.12424500 |
| C | -5.12842000  | 4.98108900  | -0.12519800 |
| C | -5.56923200  | 3.62940200  | -0.09131600 |
| C | -4.63331000  | 2.59256700  | -0.06636800 |

|   |              |            |             |
|---|--------------|------------|-------------|
| H | -1.78656300  | 4.47014300 | -0.09850200 |
| H | -3.42357100  | 6.33059500 | -0.13660000 |
| H | -4.95353900  | 1.55626900 | -0.04129400 |
| C | -7.40095400  | 5.04584500 | -0.12467900 |
| C | -8.74814200  | 5.43259600 | -0.12181400 |
| C | -9.71780500  | 4.43574200 | -0.09685900 |
| C | -9.37056900  | 3.05583700 | -0.06966800 |
| C | -8.00799400  | 2.68260000 | -0.06594900 |
| C | -7.02339200  | 3.66701700 | -0.09096300 |
| H | -9.04003600  | 6.47678600 | -0.13297600 |
| H | -10.76743600 | 4.70826200 | -0.09457600 |
| H | -7.74392700  | 1.63089300 | -0.04169500 |
| N | -6.24965500  | 5.82624100 | -0.15695700 |
| C | -6.20215300  | 7.27982100 | -0.17587800 |
| H | -6.11210900  | 7.70119000 | 0.83332300  |
| H | -5.34816600  | 7.61190700 | -0.77242400 |
| H | -7.10952900  | 7.67174800 | -0.64113700 |
| C | -10.38804900 | 2.06313300 | -0.04414900 |
| C | -11.25559300 | 1.20053900 | -0.02316000 |
| C | -2.27002100  | 1.85676900 | -0.04634500 |
| C | -1.37784100  | 1.00851100 | -0.02670800 |

SCF Done: E(RB+HF-LYP) = -3754.94977082 a.u.

Number of Imaginary frequencies: 0

### Complex pt-3 (DFT//B3LYP/6-31G(d)/LanL2DZ)

Symbolic Z-matrix:

Charge = 0 Multiplicity = 1 Ground state geometry.

|   |             |             |             |
|---|-------------|-------------|-------------|
| C | -4.46613800 | 3.40968300  | 0.11963000  |
| C | -5.72242900 | 2.79322900  | 0.15860300  |
| C | -5.72557800 | 1.39034900  | 0.12741000  |
| C | -4.53826300 | 0.66343000  | 0.05781800  |
| C | -3.30994400 | 2.63999700  | 0.05023000  |
| C | -4.47593500 | -0.81642800 | 0.02050800  |
| C | -5.59752400 | -1.64207200 | 0.07098100  |
| C | -5.47841400 | -3.03964400 | 0.03514800  |
| C | -4.17667500 | -3.54701300 | -0.05586100 |
| C | -3.08915000 | -2.68124200 | -0.10312700 |
| H | -4.36368700 | 4.48734200  | 0.14059700  |
| H | -2.32013200 | 3.08246700  | 0.01648800  |
| H | -3.98604500 | -4.61228300 | -0.08919600 |
| H | -2.06757600 | -3.03940900 | -0.17188200 |

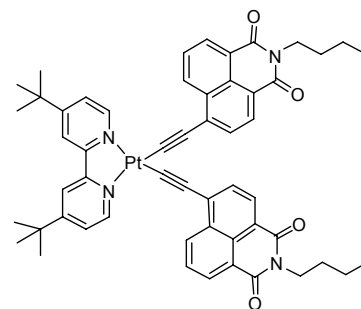

|    |             |             |             |
|----|-------------|-------------|-------------|
| N  | -3.22652600 | -1.34799300 | -0.06567900 |
| N  | -3.33694000 | 1.30033800  | 0.01784000  |
| Pt | -1.63203600 | 0.04902400  | -0.11254600 |
| C  | -0.19139400 | -1.25983800 | -0.24312400 |
| C  | 0.67258600  | -2.12530400 | -0.33587100 |
| C  | -0.30650700 | 1.47928200  | -0.13666300 |
| C  | 0.49627900  | 2.40608400  | -0.14811800 |
| H  | -6.58025700 | -1.19272500 | 0.14143900  |
| H  | -6.66901300 | 0.85925600  | 0.15597900  |
| C  | -6.73032400 | -3.92646300 | 0.09512200  |
| C  | -7.04388300 | 3.57229200  | 0.22955900  |
| C  | -7.49662300 | -3.63613800 | 1.40854900  |
| H  | -7.82257500 | -2.59247500 | 1.47383400  |
| H  | -8.39139300 | -4.26627100 | 1.46506800  |
| H  | -6.87487400 | -3.85022500 | 2.28486800  |
| C  | -7.63804800 | -3.60415700 | -1.11684000 |
| H  | -8.53905000 | -4.22723100 | -1.08496400 |
| H  | -7.95952500 | -2.55703700 | -1.12356500 |
| H  | -7.12098700 | -3.80355000 | -2.06200500 |
| C  | -6.37967300 | -5.42605700 | 0.05702100  |
| H  | -5.86211800 | -5.70280000 | -0.86840400 |
| H  | -5.75274400 | -5.72188300 | 0.90574700  |
| H  | -7.29998900 | -6.01733600 | 0.10715300  |
| C  | -7.90593600 | 3.22268100  | -1.00785900 |
| H  | -8.13905000 | 2.15367800  | -1.05886300 |
| H  | -8.85600900 | 3.76738900  | -0.96656700 |
| H  | -7.39550000 | 3.50079400  | -1.93658300 |
| C  | -7.80154400 | 3.17177000  | 1.51877200  |
| H  | -8.74741100 | 3.72156900  | 1.58106000  |
| H  | -8.03798700 | 2.10249400  | 1.54225200  |
| H  | -7.21296200 | 3.40639100  | 2.41257600  |
| C  | -6.81598800 | 5.09549700  | 0.25009800  |
| H  | -6.23279400 | 5.41123200  | 1.12248800  |
| H  | -6.30352200 | 5.44471300  | -0.65334800 |
| H  | -7.78214700 | 5.60858400  | 0.29798800  |
| C  | 1.68041900  | -3.11951400 | -0.44517000 |
| C  | 2.86777600  | -3.05946900 | 0.37092600  |
| C  | 1.54402400  | -4.17481400 | -1.35215600 |
| C  | 3.08836800  | -2.02652700 | 1.31558900  |
| C  | 3.86144100  | -4.07460500 | 0.22621300  |
| C  | 2.52833400  | -5.16390700 | -1.48055900 |
| H  | 0.65529200  | -4.21604500 | -1.97388700 |
| C  | 4.24189800  | -1.99438900 | 2.07758000  |
| H  | 2.32746900  | -1.26035700 | 1.42936600  |
| C  | 5.03597400  | -4.02296500 | 1.02101100  |
| C  | 3.67823100  | -5.12706200 | -0.70615200 |

|   |            |             |             |
|---|------------|-------------|-------------|
| H | 2.40997300 | -5.97609600 | -2.19045200 |
| C | 5.22145000 | -2.99609000 | 1.93111100  |
| H | 4.39426800 | -1.19373900 | 2.79542100  |
| H | 6.13141100 | -2.98528300 | 2.52219500  |
| C | 1.47347700 | 3.43515100  | -0.15930300 |
| C | 2.87814000 | 3.10611000  | -0.16720200 |
| C | 1.10215200 | 4.78298700  | -0.15886900 |
| C | 3.34403600 | 1.76795500  | -0.17193300 |
| C | 3.83811100 | 4.16276700  | -0.16783400 |
| C | 2.05728500 | 5.80808900  | -0.16356100 |
| H | 0.04608500 | 5.03421200  | -0.15468500 |
| C | 4.69757900 | 1.48707500  | -0.17137400 |
| H | 2.61267000 | 0.96563900  | -0.18001800 |
| C | 5.22256800 | 3.85080900  | -0.16922100 |
| C | 3.41292800 | 5.51567500  | -0.16662800 |
| H | 1.75420600 | 6.85009400  | -0.16351600 |
| C | 5.64263900 | 2.53122800  | -0.16951200 |
| H | 5.03409600 | 0.45457900  | -0.16999500 |
| H | 6.70839600 | 2.32692200  | -0.16971300 |
| C | 6.07756300 | -5.06883200 | 0.88390200  |
| C | 4.69668300 | -6.18741900 | -0.86656000 |
| N | 5.84136000 | -6.08317000 | -0.05453900 |
| O | 4.56688000 | -7.11403400 | -1.65850500 |
| O | 7.10870600 | -5.07505800 | 1.54554400  |
| C | 6.88371500 | -7.10642500 | -0.17793000 |
| H | 7.83227000 | -6.63745400 | -0.45110200 |
| H | 7.01889700 | -7.61712300 | 0.77906300  |
| H | 6.56704900 | -7.80890200 | -0.94556100 |
| C | 4.39419400 | 6.62208200  | -0.16843100 |
| C | 6.23224400 | 4.93530600  | -0.16939300 |
| O | 7.43945100 | 4.72574300  | -0.16856000 |
| O | 4.06007100 | 7.80189500  | -0.16791500 |
| N | 5.75170900 | 6.25312400  | -0.17051100 |
| C | 6.76525600 | 7.31168600  | -0.17252100 |
| H | 7.40101700 | 7.21510400  | -1.05630400 |
| H | 6.24446300 | 8.26657300  | -0.17673100 |
| H | 7.39826500 | 7.22185000  | 0.71403000  |

.....

SCF Done: E(RB+HF-LYP) = -2492.34147236 a.u.

Number of Imaginary frequencies: 0
